# Supplementary material
Source: PubMed Central journal article supplement (PMC7708390)
Supplement: NIHMS1552790-supplement-1.pdf [file NIHMS1552790-supplement-1.pdf]

### Supplemental Figure Legends

Figure S1. Chr2-GFP expression in PV cells of PV-Cre x Ai32 mice intrahippocampally injected with KA. (A) Brain slice of a chronically epileptic mouse depicts survival of PV cells in a PV-Cre x Ai32 animal treated with IHKA (Inset A': a different single image plane of the outlined area which best visualizes cells seen in panel C). Note the remodeling of the hippocampal formation and loss of a defined laminar structure on the injection side. Scale bar, 500  $\mu\text{m}$ . (B, C) Orthogonal projection of z-stack images showing Chr2-GFP fluorescence (left) and PV immunostaining (middle) co-localization (right) in both the contralateral (B) and ipsilateral (C) hippocampus of PV-Cre x Ai32 mice. Scale bar, 20  $\mu\text{m}$ . (D) Orthogonal projection of z-stack images of the ipsilateral hippocampus from a different chronically epileptic mouse, below the optrode (arrow), shows survival of PV cells in various areas below and above the hippocampal fissure (dashed line). Scale bar, 200  $\mu\text{m}$ .

**Figure S2.** Post-hoc histological verification of optical fiber locations in chronically epileptic mice with optogenetic seizure intervention

**Figure S3.** Comparison of object location memory performance based on ChR2 opsin expression status. Opsin negative (n=12) and opsin positive (n=12) animals produced from crossing PV-Cre to Cre-dependent ChR2 reveals no difference between object location discrimination (Opsin negative  $DI=25.6\pm 5.0$ , Opsin positive  $DI=28.3\pm 4.6$ ,  $p=0.71$ ) or exploration time (Opsin negative,  $3.9\pm 0.2$  s; Opsin positive,  $4.1\pm 0.2$  s;  $p=0.51$ ).

**Table S1.** Overall animal data for object location memory testing

**Table S2.** Experimental steps and animal dropout
