# Supplementary material
Source: PubMed Central journal article supplement (PMC7708390)
Supplement: NIHMS1552790-supplement-Supp_table_1.pdf [file NIHMS1552790-supplement-Supp_table_1.pdf]

Table S1. Overall animal data for object location memory testing

| Test                 | Animal | Status  | Discrimination Index | Exploration Time (s) |
|----------------------|--------|---------|----------------------|----------------------|
| 10 Days Post IHKA    | 1      | Control | 29.29293             | 4.95                 |
| 10 Days Post IHKA    | 2      | Control | 20.59701             | 3.35                 |
| 10 Days Post IHKA    | 3      | Control | 29.87013             | 3.08                 |
| 10 Days Post IHKA    | 4      | Control | 35.66879             | 3.14                 |
| 10 Days Post IHKA    | 5      | Control | 33.94495             | 4.36                 |
| 10 Days Post IHKA    | 6      | Control | 27.53623             | 4.83                 |
| 10 Days Post IHKA    | 7      | IHKA    | -1.84049             | 4.89                 |
| 10 Days Post IHKA    | 8      | IHKA    | -21.85185            | 5.4                  |
| 10 Days Post IHKA    | 9      | IHKA    | 19.02439             | 4.1                  |
| 10 Days Post IHKA    | 10     | IHKA    | 2.15827              | 4.17                 |
| 10 Days Post IHKA    | 11     | IHKA    | -10.4                | 5                    |
| 10 Days Post IHKA    | 12     | IHKA    | 2.39726              | 5.84                 |
| 10 Days Post IHKA    | 13     | IHKA    | 11.40065             | 3.07                 |
| 10 Days Post IHKA    | 14     | IHKA    | 18.71456             | 5.29                 |
| 10 Days Post IHKA    | 15     | IHKA    | 15.15152             | 3.96                 |
| 10 Days Post IHKA    | 16     | IHKA    | 24.4186              | 3.44                 |
| 3-4 Months Post IHKA | 1      | Control | 32.36152             | 3.43                 |
| 3-4 Months Post IHKA | 2      | Control | 24.51362             | 5.14                 |
| 3-4 Months Post IHKA | 3      | Control | 48.63014             | 2.92                 |
| 3-4 Months Post IHKA | 4      | Control | 39.04762             | 4.2                  |
| 3-4 Months Post IHKA | 5      | Control | 33.33333             | 3.57                 |
| 3-4 Months Post IHKA | 6      | IHKA    | 27.92363             | 4.19                 |
| 3-4 Months Post IHKA | 7      | IHKA    | 7.31707              | 2.87                 |
| 3-4 Months Post IHKA | 8      | IHKA    | 4.80769              | 4.16                 |
| 3-4 Months Post IHKA | 9      | IHKA    | 11.44279             | 4.02                 |
| 3-4 Months Post IHKA | 10     | IHKA    | 1.4218               | 4.22                 |
| 3-4 Months Post IHKA | 11     | IHKA    | 21.19816             | 4.34                 |
| 3-4 Months Post IHKA | 12     | IHKA    | 10.6383              | 3.76                 |
| 3-4 Months Post IHKA | 13     | IHKA    | 9.19881              | 3.37                 |
| 3-4 Months Post IHKA | 14     | IHKA    | 5.05415              | 5.54                 |
| 6-7 Months Post IHKA | 1      | Control | 23.26284             | 6.62                 |
| 6-7 Months Post IHKA | 2      | Control | 38.72054             | 5.94                 |
| 6-7 Months Post IHKA | 3      | Control | 40.99217             | 3.83                 |
| 6-7 Months Post IHKA | 4      | Control | 28.76712             | 5.84                 |
| 6-7 Months Post IHKA | 5      | Control | 43.98564             | 5.57                 |
| 6-7 Months Post IHKA | 6      | Control | 11.06719             | 5.06                 |
| 6-7 Months Post IHKA | 7      | Control | 44.44444             | 5.76                 |
| 6-7 Months Post IHKA | 8      | Control | 9.93072              | 4.33                 |
| 6-7 Months Post IHKA | 9      | Control | 33.47023             | 4.87                 |
| 6-7 Months Post IHKA | 10     | Control | 46.8144              | 3.61                 |
| 6-7 Months Post IHKA | 11     | Control | 22.93987             | 4.49                 |
| 6-7 Months Post IHKA | 12     | Control | 6.51769              | 5.37                 |
| 6-7 Months Post IHKA | 13     | Control | 34.51327             | 4.52                 |
| 6-7 Months Post IHKA | 14     | Control | 43.13253             | 4.15                 |
| 6-7 Months Post IHKA | 15     | IHKA    | 20.09456             | 4.23                 |

|                      |    |      |          |      |
|----------------------|----|------|----------|------|
| 6-7 Months Post IHKA | 16 | IHKA | 9.67742  | 4.65 |
| 6-7 Months Post IHKA | 17 | IHKA | 5.03282  | 4.57 |
| 6-7 Months Post IHKA | 18 | IHKA | 12.34867 | 4.13 |
| 6-7 Months Post IHKA | 19 | IHKA | 4.51436  | 7.31 |
| 6-7 Months Post IHKA | 20 | IHKA | 1.14416  | 4.37 |
| 6-7 Months Post IHKA | 21 | IHKA | -0.63425 | 4.73 |
| 6-7 Months Post IHKA | 22 | IHKA | 14.22846 | 4.99 |
| 6-7 Months Post IHKA | 23 | IHKA | 8.25083  | 3.03 |

|        |    |      |           |      |
|--------|----|------|-----------|------|
| Female | 1  | IHKA | 18.33333  | 4.8  |
| Female | 2  | IHKA | -30.98237 | 3.97 |
| Female | 3  | IHKA | 10.60071  | 5.66 |
| Female | 4  | IHKA | 7.01754   | 4.56 |
| Female | 5  | IHKA | 19.92883  | 5.62 |
| Female | 6  | IHKA | 37.4677   | 3.87 |
| Female | 7  | IHKA | -16.89751 | 3.61 |
| Female | 8  | IHKA | 20.09456  | 4.23 |
| Female | 9  | IHKA | 4.45104   | 3.37 |
| Female | 10 | IHKA | 2.23048   | 5.38 |
| Female | 11 | IHKA | 9.24092   | 6.06 |
| Female | 12 | IHKA | 22.89157  | 4.98 |
| Female | 13 | IHKA | -9.12548  | 5.26 |
| Female | 14 | IHKA | 13.51351  | 3.7  |
| Female | 15 | IHKA | 27.42616  | 4.74 |
| Female | 16 | IHKA | 2.6087    | 4.6  |
| Female | 17 | IHKA | 9         | 6    |
| Female | 18 | IHKA | 6.25954   | 6.55 |
| Female | 19 | IHKA | 31.42857  | 5.6  |
| Female | 20 | IHKA | 16.81818  | 4.4  |
| Female | 21 | IHKA | -14.83421 | 5.73 |
| Female | 22 | IHKA | 28.59961  | 5.07 |
| Female | 23 | IHKA | 1.62602   | 4.92 |
| Male   | 1  | IHKA | 19.88131  | 3.37 |
| Male   | 2  | IHKA | 12.62626  | 3.96 |
| Male   | 3  | IHKA | 0.34843   | 2.87 |
| Male   | 4  | IHKA | 2.75229   | 3.27 |
| Male   | 5  | IHKA | -6.12245  | 4.9  |
| Male   | 6  | IHKA | 0.8596    | 3.49 |
| Male   | 7  | IHKA | -10.52632 | 4.18 |
| Male   | 8  | IHKA | 23.24561  | 4.56 |
| Male   | 9  | IHKA | 11.37441  | 4.22 |
| Male   | 10 | IHKA | 19.03323  | 3.31 |
| Male   | 11 | IHKA | 3.85604   | 3.89 |
| Male   | 12 | IHKA | 5.32213   | 3.57 |
| Male   | 13 | IHKA | 9.12698   | 5.04 |
| Male   | 14 | IHKA | 9.67742   | 4.65 |
| Male   | 15 | IHKA | 7.50751   | 3.33 |
| Male   | 16 | IHKA | 6.60981   | 4.69 |

|        |    |         |           |      |
|--------|----|---------|-----------|------|
| Male   | 17 | IHKA    | 20.32967  | 3.64 |
| Male   | 18 | IHKA    | 5.03282   | 4.57 |
| Male   | 19 | IHKA    | 9.21228   | 7.49 |
| Male   | 20 | IHKA    | -7.30051  | 5.89 |
| Male   | 21 | IHKA    | 8.78049   | 4.1  |
| Male   | 22 | IHKA    | -15.26104 | 4.98 |
| Male   | 23 | IHKA    | 2.89017   | 5.19 |
| Male   | 24 | IHKA    | 4.63918   | 3.88 |
| Male   | 25 | IHKA    | 12.34867  | 4.13 |
| Male   | 26 | IHKA    | 4.51436   | 7.31 |
| Male   | 27 | IHKA    | 0.369     | 5.42 |
| Female | 1  | Control | 13.56589  | 5.16 |
| Female | 2  | Control | 32.65306  | 4.9  |
| Female | 3  | Control | 43.98564  | 5.57 |
| Female | 4  | Control | 43.13253  | 4.15 |
| Female | 5  | Control | 34.51327  | 4.52 |
| Female | 6  | Control | 23.56021  | 3.82 |
| Female | 7  | Control | 32.93886  | 5.07 |
| Female | 8  | Control | 49.59128  | 7.34 |
| Female | 9  | Control | 36.54917  | 5.39 |
| Female | 10 | Control | 35.89165  | 4.43 |
| Female | 11 | Control | 28.76712  | 5.84 |
| Female | 12 | Control | 39.33464  | 5.11 |
| Female | 13 | Control | 6.51769   | 5.37 |
| Female | 14 | Control | 25.41667  | 4.8  |
| Female | 15 | Control | -2.5641   | 3.12 |
| Female | 16 | Control | 40.99217  | 3.83 |
| Male   | 1  | Control | 46.8144   | 3.61 |
| Male   | 2  | Control | 22.93987  | 4.49 |
| Male   | 3  | Control | 36.75214  | 4.68 |
| Male   | 4  | Control | 9.93072   | 4.33 |
| Male   | 5  | Control | 44.44444  | 5.76 |
| Male   | 6  | Control | 11.06719  | 5.06 |
| Male   | 7  | Control | 40.12739  | 3.14 |
| Male   | 8  | Control | 26.56587  | 4.63 |
| Male   | 9  | Control | 31.68142  | 5.65 |
| Male   | 10 | Control | 12.79621  | 4.22 |
| Male   | 11 | Control | 33.47023  | 4.87 |
| Male   | 12 | Control | 8.14332   | 3.07 |

|       |   |                    |           |      |
|-------|---|--------------------|-----------|------|
| OLM 1 | 1 | Epileptic w/ light | 19.92883  | 5.62 |
| OLM 1 | 2 | Epileptic w/ light | 7.50751   | 3.33 |
| OLM 1 | 3 | Epileptic w/ light | 9.12698   | 5.04 |
| OLM 1 | 4 | Epileptic w/ light | 23.24561  | 4.56 |
| OLM 1 | 5 | Epileptic w/ light | -14.83421 | 5.73 |
| OLM 1 | 6 | Epileptic w/ light | 5.32213   | 3.57 |
| OLM 1 | 7 | Epileptic w/ light | 13.51351  | 3.7  |
| OLM 1 | 8 | Epileptic w/ light | 3.85604   | 3.89 |

|       |    |                     |           |      |
|-------|----|---------------------|-----------|------|
| OLM 2 | 1  | Epileptic w/ light  | 34.49275  | 3.45 |
| OLM 2 | 2  | Epileptic w/ light  | 7.84983   | 2.93 |
| OLM 2 | 3  | Epileptic w/ light  | 11.48459  | 3.57 |
| OLM 2 | 4  | Epileptic w/ light  | 14.65517  | 4.64 |
| OLM 2 | 5  | Epileptic w/ light  | 14.32881  | 6.63 |
| OLM 2 | 6  | Epileptic w/ light  | 36.38554  | 4.15 |
| OLM 2 | 7  | Epileptic w/ light  | 33.448    | 5.8  |
| OLM 2 | 8  | Epileptic w/ light  | 17.605    | 5.68 |
| OLM 1 | 1  | Epileptic w/o light | 19.03323  | 3.31 |
| OLM 1 | 2  | Epileptic w/o light | 20.32967  | 3.64 |
| OLM 1 | 3  | Epileptic w/o light | -6.12245  | 4.9  |
| OLM 1 | 4  | Epileptic w/o light | 2.75229   | 3.27 |
| OLM 1 | 5  | Epileptic w/o light | -9.12548  | 5.26 |
| OLM 1 | 6  | Epileptic w/o light | 22.89157  | 4.98 |
| OLM 1 | 7  | Epileptic w/o light | 0.8596    | 3.49 |
| OLM 1 | 8  | Epileptic w/o light | -7.30051  | 5.89 |
| OLM 1 | 9  | Epileptic w/o light | 9.24092   | 6.06 |
| OLM 1 | 10 | Epileptic w/o light | 12.62626  | 3.96 |
| OLM 1 | 11 | Epileptic w/o light | 2.6087    | 4.6  |
| OLM 1 | 12 | Epileptic w/o light | 2.23048   | 5.38 |
| OLM 1 | 13 | Epileptic w/o light | 20.09456  | 4.23 |
| OLM 1 | 14 | Epileptic w/o light | 6.25954   | 6.55 |
| OLM 1 | 15 | Epileptic w/o light | 19.88131  | 3.37 |
| OLM 1 | 16 | Epileptic w/o light | 4.45104   | 3.37 |
| OLM 1 | 17 | Epileptic w/o light | 31.42857  | 5.6  |
| OLM 1 | 18 | Epileptic w/o light | 18.33333  | 4.8  |
| OLM 2 | 1  | Epileptic w/o light | 10.88435  | 2.94 |
| OLM 2 | 2  | Epileptic w/o light | 18.63517  | 3.81 |
| OLM 2 | 3  | Epileptic w/o light | 31.85841  | 4.52 |
| OLM 2 | 4  | Epileptic w/o light | -22.76786 | 4.48 |
| OLM 2 | 5  | Epileptic w/o light | -0.71174  | 5.62 |
| OLM 2 | 6  | Epileptic w/o light | 13.78092  | 2.83 |
| OLM 2 | 7  | Epileptic w/o light | 11.55779  | 5.97 |
| OLM 2 | 8  | Epileptic w/o light | -13.38583 | 6.35 |
| OLM 2 | 9  | Epileptic w/o light | 14.45783  | 4.98 |
| OLM 2 | 10 | Epileptic w/o light | 14.28571  | 3.57 |
| OLM 2 | 11 | Epileptic w/o light | 34.17191  | 4.77 |
| OLM 2 | 12 | Epileptic w/o light | 17.07317  | 6.56 |
| OLM 2 | 13 | Epileptic w/o light | -10.3139  | 4.46 |
| OLM 2 | 14 | Epileptic w/o light | 13.42756  | 5.66 |
| OLM 2 | 15 | Epileptic w/o light | 20.2046   | 3.91 |
| OLM 2 | 16 | Epileptic w/o light | -12.5     | 3.52 |
| OLM 2 | 17 | Epileptic w/o light | -10.67961 | 3.09 |
| OLM 2 | 18 | Epileptic w/o light | 23.31407  | 5.19 |
| OLM 1 | 1  | Nonepileptic        | 17.05426  | 5.16 |
| OLM 1 | 2  | Nonepileptic        | -13.64653 | 4.47 |
| OLM 1 | 3  | Nonepileptic        | 17.84703  | 3.53 |
| OLM 1 | 4  | Nonepileptic        | 12.79621  | 4.22 |

|       |    |              |          |      |
|-------|----|--------------|----------|------|
| OLM 1 | 5  | Nonepileptic | 13.56589 | 5.16 |
| OLM 1 | 6  | Nonepileptic | 39.33464 | 5.11 |
| OLM 1 | 7  | Nonepileptic | 31.68142 | 5.65 |
| OLM 1 | 8  | Nonepileptic | 41.44144 | 4.44 |
| OLM 1 | 9  | Nonepileptic | -2.5641  | 3.12 |
| OLM 1 | 10 | Nonepileptic | 25.41667 | 4.8  |
| OLM 1 | 11 | Nonepileptic | 35.89165 | 4.43 |
| OLM 1 | 12 | Nonepileptic | 49.59128 | 7.34 |
| OLM 1 | 13 | Nonepileptic | 32.93886 | 5.07 |
| OLM 1 | 14 | Nonepileptic | 36.54917 | 5.39 |
| OLM 1 | 15 | Nonepileptic | 32.65306 | 4.9  |
| OLM 1 | 16 | Nonepileptic | 23.26284 | 6.62 |
| OLM 1 | 17 | Nonepileptic | 38.72054 | 5.94 |
| OLM 1 | 18 | Nonepileptic | 40.99217 | 3.83 |
| OLM 1 | 19 | Nonepileptic | 28.76712 | 5.84 |
| OLM 1 | 20 | Nonepileptic | 43.98564 | 5.57 |
| OLM 1 | 21 | Nonepileptic | 11.06719 | 5.06 |
| OLM 1 | 22 | Nonepileptic | 44.44444 | 5.76 |
| OLM 1 | 23 | Nonepileptic | 9.93072  | 4.33 |
| OLM 1 | 24 | Nonepileptic | 33.47023 | 4.87 |
| OLM 1 | 25 | Nonepileptic | 46.8144  | 3.61 |
| OLM 1 | 26 | Nonepileptic | 22.93987 | 4.49 |
| OLM 1 | 27 | Nonepileptic | 6.51769  | 5.37 |
| OLM 1 | 28 | Nonepileptic | 34.51327 | 4.52 |
| OLM 1 | 29 | Nonepileptic | 43.13253 | 4.15 |
| OLM 1 | 30 | Nonepileptic | 40.12739 | 3.14 |
| OLM 1 | 31 | Nonepileptic | 8.14332  | 3.07 |
| OLM 1 | 32 | Nonepileptic | 26.56587 | 4.63 |
| OLM 1 | 33 | Nonepileptic | 36.75214 | 4.68 |
| OLM 1 | 34 | Nonepileptic | 23.56021 | 3.82 |
| OLM 2 | 1  | Nonepileptic | 9.03614  | 3.32 |
| OLM 2 | 2  | Nonepileptic | -9.96979 | 3.31 |
| OLM 2 | 3  | Nonepileptic | 17.32523 | 3.29 |
| OLM 2 | 4  | Nonepileptic | 17.51412 | 3.54 |
| OLM 2 | 5  | Nonepileptic | 8.93372  | 3.47 |
| OLM 2 | 6  | Nonepileptic | 34.36123 | 4.54 |
| OLM 2 | 7  | Nonepileptic | 42.91755 | 4.73 |
| OLM 2 | 8  | Nonepileptic | 23.58318 | 5.47 |
| OLM 2 | 9  | Nonepileptic | -8.51852 | 5.4  |
| OLM 2 | 10 | Nonepileptic | 26.54746 | 7.27 |
| OLM 2 | 11 | Nonepileptic | 29.55752 | 5.65 |
| OLM 2 | 12 | Nonepileptic | 36.66667 | 7.8  |
| OLM 2 | 13 | Nonepileptic | 27.64858 | 3.87 |
| OLM 2 | 14 | Nonepileptic | 27.53623 | 3.45 |
| OLM 2 | 15 | Nonepileptic | 44.91979 | 3.74 |
| OLM 2 | 16 | Nonepileptic | 19.91614 | 4.77 |
| OLM 2 | 17 | Nonepileptic | 27.97428 | 6.22 |
| OLM 2 | 18 | Nonepileptic | 40.88398 | 3.62 |

|       |    |              |          |      |
|-------|----|--------------|----------|------|
| OLM 2 | 19 | Nonepileptic | 14.40678 | 4.72 |
| OLM 2 | 20 | Nonepileptic | 27.32026 | 7.65 |
| OLM 2 | 21 | Nonepileptic | 18.77729 | 4.58 |
| OLM 2 | 22 | Nonepileptic | 37.07865 | 5.34 |
| OLM 2 | 23 | Nonepileptic | 21.75649 | 5.01 |
| OLM 2 | 24 | Nonepileptic | 41.4966  | 2.94 |
| OLM 2 | 25 | Nonepileptic | 23.45013 | 3.71 |
| OLM 2 | 26 | Nonepileptic | 25.52083 | 3.84 |
| OLM 2 | 27 | Nonepileptic | 0.45045  | 4.44 |
| OLM 2 | 28 | Nonepileptic | -3.48837 | 3.44 |
| OLM 2 | 29 | Nonepileptic | 20.7824  | 4.09 |
| OLM 2 | 30 | Nonepileptic | 18.30986 | 2.84 |
| OLM 2 | 31 | Nonepileptic | 20.14134 | 2.83 |
| OLM 2 | 32 | Nonepileptic | 8.70588  | 4.25 |
| OLM 2 | 33 | Nonepileptic | 35.34743 | 3.31 |
| OLM 2 | 34 | Nonepileptic | 11.74377 | 2.81 |
