# Supplementary material
Source: PubMed Central journal article supplement (PMC7708390)
Supplement: NIHMS1552790-supplement-Supp_table_2.pdf [file NIHMS1552790-supplement-Supp_table_2.pdf]

Table S2. Experimental steps and animal dropout

| Experiment Phase                              | Approximate Dropout Rate | Causes                                                                                                                         |
|-----------------------------------------------|--------------------------|--------------------------------------------------------------------------------------------------------------------------------|
| Intrahippocampal kainic acid                  | 33%                      | Status epilepticus                                                                                                             |
| OptoElectrode implantation and EEG monitoring | 40%                      | Unusable implant or EEG, unexpected death/illness                                                                              |
| Closed-loop intervention testing              | 33%                      | Unusable optical fiber, lack of response to closed loop optogenetic seizure intervention, unexpected death/illness             |
| Object location memory tests                  | 25%                      | Side preference demonstrated during training phase, lack of exploration during testing phase, unexpected death/illness/seizure |
